# Supplementary material
Source: MDPI journal article supplement (https://www.mdpi.com/2311-7524/9/9/1045)

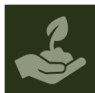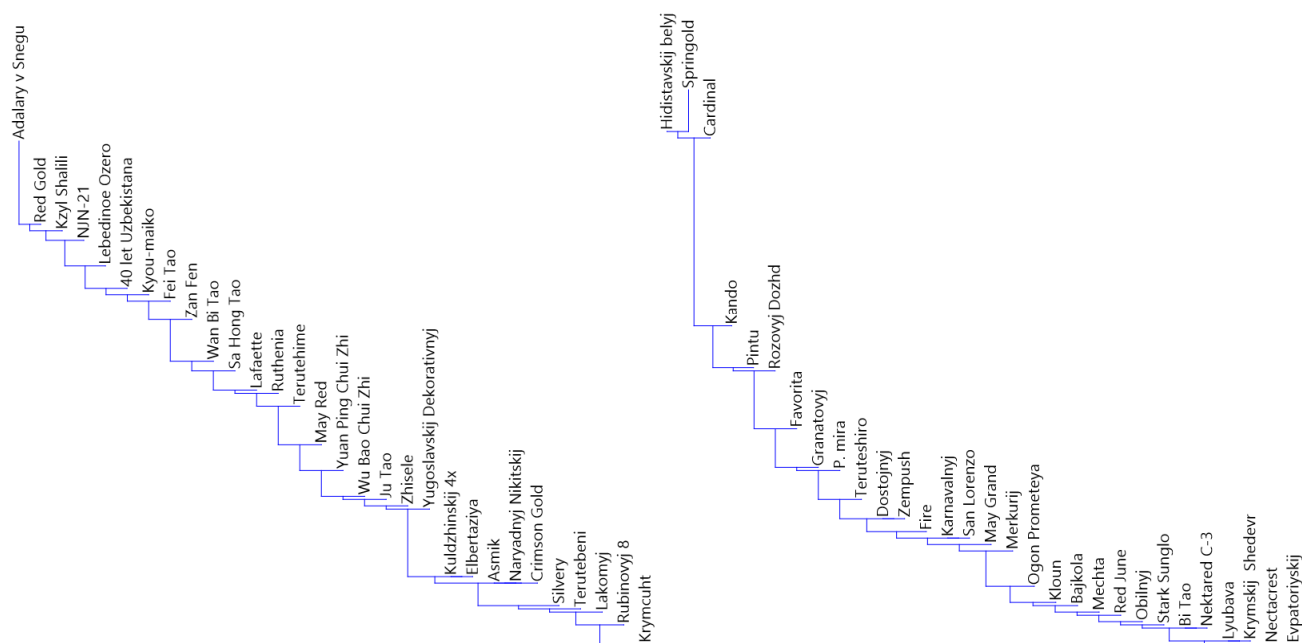

Figure S1. Neighbor-joining clustering of the peach cultivars according to water loss values.

Supplement: s1 [file s1]
